# Supplementary material for: Inhibitors of Venezuelan Equine Encephalitis Virus Identified Based on Host Interaction Partners of Viral Non-Structural Protein 3
Source: Viruses. 2021 Aug 3;13(8):1533. doi: 10.3390/v13081533 (PMC8402862; doi:10.3390/v13081533)
Supplement: Supplementary file 1 [file viruses-13-01533-s001.zip › Supplementary File 1 Host Interactors.xlsx]

## Sheet: nsp3 Combined Protein Hits for 
Molecule Name	Entrez Gene ID for Human
ACBD3	64746
ADAR	103
AP2A1	160
APMAP	57136
BCKDHA	593
C11orf58	10944
CALU	813
CD2AP	23607
CELF2	10659
CHMP2A	27243
CIAO1	9391
CIP2A	57650
CIRBP	1153
CLINT1	9685
CNDP2	55748
COMT	1312
CORO1C	23603
CPVL	54504
CRTC2	200186
CTSC	1075
CUL3	8452
DCPS	28960
DCTN5	84516
DLAT	1737
DNAJC9	23234
DNAJC17	55192
DNPEP	23549
DR1	1810
ECI2	10455
EFHD1	80303
EFHD2	79180
EIF1AY	9086
EIF2S2	8894
EPB41L2	2037
EXOSC1	51013
FAM208B	54906
FBF1	85302
FTO	79068
FXR2	9513
GALK1	2584
GEMIN2	8487
GLB1	2720
GTF3C1	2975
H1FX	8971
HPS1	3257
HSPB1	3315
IGF2BP2	10644
IST1	9798
JMJD6	23210
KATNAL2	83473
KLC1	3831
LAMC1	3915
LMNB2	84823
LSM6	11157
MED25	81857
MRPL15	29088
MRPS28	28957
NCBP1	4686
NEK9	91754
NRDC	4898
NUFIP2	57532
NUP214	8021
OSTC	58505
OTUD6B	51633
PGLS	25796
PITRM1	10531
PMM2	5373
PMVK	10654
PPM1B	5495
PPP3CA	5530
PPP3CB	5532
PPT1	5538
PRKAR2B	5577
PRPF4	9128
PSME1	5720
PTOV1	53635
QSER1	79832
RAB15	376267
RANBP2	5903
RANBP3	8498
RAP1GDS1	5910
RBM22	55696
RDH11	51109
RGPD4 (includes others)	653489|729857|400966|727851|729540|84220|285190
RPA3	6119
SACM1L	22908
SEC13	6396
SF3B5	83443
SRP19	6728
SSRP1	6749
SUPT16H	11198
TERF2IP	54386
TES	26136
THOC3	84321
THRAP3	9967
TIPRL	261726
TMA16	55319
TRA2A	29896
TRAFD1	10906
UBE2O	63893
VIM	7431
WDR12	55759
XRCC1	7515
ZFP91	80829
ADAR	103
AP1B1	162
AP2A1	160
AP2B1	163
AP2M1	1173
AP2S1	1175
APTX	54840
BCL2L2-PABPN1	100529063
BTNL8	79908
CHD4	1108
CHMP1A	5119
CLINT1	9685
CUX1	1523
DDX3Y	8653
DR1	1810
EXOC7	23265
FAM98A	25940
FUBP3	8939
H2AFY2	55506
HOXD13	3239
IST1	9798
KCTD9	54793
KHDRBS1	10657
LEMD2	221496
MCM4	4173
MRE11	4361
NBN	4683
NFYC	4802
PABPN1	8106
PARP2	10038
PFN1	5216
PNKP	11284
POLB	5423
POLDIP3	84271
RBM8A	9939
RFC1	5981
RNPS1	10921
RPA2	6118
SALL1	6299
SATB1	6304
SEC16A	9919
SRSF3	6428
TCOF1	6949
TFAP2A	7020
TFAP2B	7021
TFAP2E	339488
TRA2A	29896
TTF2	8458
TWNK	56652
UBN2	254048
ULK2	9706
USP46	64854
VRK3	51231
WRN	7486
ZFHX4	79776
ZNF281	23528
