# Supplementary material for: Inhibitors of Venezuelan Equine Encephalitis Virus Identified Based on Host Interaction Partners of Viral Non-Structural Protein 3
Source: Viruses. 2021 Aug 3;13(8):1533. doi: 10.3390/v13081533 (PMC8402862; doi:10.3390/v13081533)
Supplement: Supplementary file 1 [file viruses-13-01533-s001.zip › Supplementary File 2 Identified Inhibitors.xlsx]

## Sheet: Sheet1
© 2000-2019 QIAGEN. All rights reserved.
Upstream Regulator	Molecule Type	p-value of overlap	Target Molecules in Dataset	Mechanistic Network
ST1926	chemical drug	0.000666	AP2M1,AP2S1,PFN1,SRSF3
CD 437	chemical drug	0.00158	AP2M1,AP2S1,PFN1,SRSF3
monobutyl phthalate	chemical toxicant	0.00406	SRSF3,TRA2A
GnRH analog	biologic drug	0.00881	CUX1,NBN,RPA2,SRSF3
CCG-1423	chemical reagent	0.0121	PFN1
Z-VEID-FMK	chemical reagent	0.0145	TFAP2A
uric acid	chemical - endogenous mammalian	0.0238	PARP2,POLB
citalopram	chemical drug	0.0288	TFAP2A
amiloride	chemical drug	0.0405	SRSF3
latrunculin B	chemical reagent	0.0405	PFN1
cyclic GMP	chemical - endogenous mammalian	0.0429	MRE11
decitabine	chemical drug	0.0449	CUX1,SATB1,TFAP2A,ULK2,WRN

## Sheet: Sheet2
© 2000-2019 QIAGEN. All rights reserved.
Upstream Regulator	Expr Fold Change	Molecule Type	Predicted Activation State	Activation z-score	Flags	p-value of overlap	Target molecules in dataset	Mechanistic Network
1,2,3,4,6,7,8-heptachlorodibenzofuran		chemical toxicant				0.0235	COMT
2,3,4,7,8-pentachlorodibenzofuran		chemical toxicant				0.0253	COMT,PRKAR2B
2,3,7,8-tetrachlorodibenzofuran		chemical toxicant				0.0235	COMT
2-morpholin-4-yl-6-thianthren-1-yl-pyran-4-one		chemical reagent				0.0281	GLB1
4-aminophenol		chemical - endogenous mammalian				0.0235	VIM
8-chloro-cAMP		chemical drug				0.0188	PRKAR2B
alpha-hydroxyglutarate		chemical - endogenous mammalian				0.0281	VIM
busulfan		chemical drug				0.0188	GLB1
butylidenephthalide		chemical reagent				0.0327	VIM
cadmium chloride		chemical toxicant				0.029	HSPB1,VIM
cholestyramine		chemical drug				0.0373	PMVK
fenamic acid		chemical reagent				0.0424	TES,VIM
gentamicin C		chemical drug				0.037	TES,VIM
hexachlorobenzene		chemical toxicant				0.0299	TES,VIM
hydrogel		chemical drug				0.0373	VIM
IND S7		chemical - kinase inhibitor				0.00775	CALU,VIM
KU-60019		chemical - kinase inhibitor				0.00945	GLB1
lomustine		chemical drug				0.037	TES,VIM
MEL S3		chemical - kinase inhibitor				0.0083	CALU,VIM
methamphetamine		chemical drug				0.0481	PPP3CA,PPP3CB
methyl methanesulfonate		chemical toxicant				0.0185	VIM,XRCC1
monobutyl phthalate		chemical toxicant				0.014	RBM22,TRA2A
nitroprusside		chemical drug				0.0235	LAMC1,ZFP91
phenacetin		chemical drug				0.0169	TES,VIM
Sch-23390		chemical drug				0.00527	PPP3CA,PPP3CB
tetraethylammonium		chemical drug				0.0154	EFHD2,HSPB1
tolcapone		chemical drug				0.00474	COMT
tomatidine		chemical - endogenous non-mammalian				0.0418	EIF2S2
trehalose		chemical - endogenous mammalian				0.0188	VIM
triamterene		chemical drug				0.0392	TES,VIM
© 2000-2019 QIAGEN. All rights reserved.
Upstream Regulator	Molecule Type	p-value of overlap	Target Molecules in Dataset	Mechanistic Network
ST1926	chemical drug	0.000666	AP2M1,AP2S1,PFN1,SRSF3
CD 437	chemical drug	0.00158	AP2M1,AP2S1,PFN1,SRSF3
monobutyl phthalate	chemical toxicant	0.00406	SRSF3,TRA2A
GnRH analog	biologic drug	0.00881	CUX1,NBN,RPA2,SRSF3
CCG-1423	chemical reagent	0.0121	PFN1
Z-VEID-FMK	chemical reagent	0.0145	TFAP2A
uric acid	chemical - endogenous mammalian	0.0238	PARP2,POLB
citalopram	chemical drug	0.0288	TFAP2A
amiloride	chemical drug	0.0405	SRSF3
latrunculin B	chemical reagent	0.0405	PFN1
cyclic GMP	chemical - endogenous mammalian	0.0429	MRE11
decitabine	chemical drug	0.0449	CUX1,SATB1,TFAP2A,ULK2,WRN
